# Supplementary material
Source: publisher figshare collection journal article supplement (https://gsapubs.figshare.com/ndownloader/files/23303432)
Supplement: Supplementary file 1 [file 23303432]

GSA Data Repository 2017068

## The origin of contractional structures in extensional gneiss domes

P. F. Rey<sup>1</sup>, L. Mondy<sup>1</sup>, G. Duclaux<sup>2</sup>, C. Teyssier<sup>3</sup>, D. L. Whitney<sup>3</sup>, M. Bocher<sup>4</sup>, C. Prigent<sup>5</sup>

### SUPPLEMENTAL FILES

**Rheology:** For frictional rheology we use a yield stress that increases linearly with depth according to:  $\tau < C_0 + \mu \cdot \sigma_n$  with  $\tau$  the second invariant of the deviatoric stress tensor;  $C_0$  the cohesion;  $\sigma_n$  the lithostatic pressure; and  $\mu$  the coefficient of friction. This frictional rheology is modulated via a strain weakening term, which reduces the cohesion and the friction coefficient (Table DR1). A stress- and temperature-dependent flow law, with imposed cut-off viscosities ( $10^{18}$  and  $10^{24}$  Pa.s), simulates incompressible viscous flow. The flow parameters are taken from experimental rheology of wet olivine for the mantle, quartz-rich rocks representative of the upper crust, and mafic granulites for the lower crust (Table DR1). When temperature exceeds a rock's solidus, the melt fraction reduces the viscosity (e.g. Rosenberg and Handy, 2005). Hence, in our experiments, the viscous rheology is modulated by a term that takes into account the presence of partial melt.

2017068\_A\_MCC230\_Input\_40km.zip

2017068\_MCC200\_Input\_60km.zip

TABLE DR1. THERMAL AND MECHANICAL PARAMETERS

| Parameters                                                     | Upper crust <sup>a</sup> | Lower crust <sup>b</sup> | Fault <sup>c</sup> | Lithospheric mantle <sup>d</sup> | Asthenosphere <sup>f</sup> |
|----------------------------------------------------------------|--------------------------|--------------------------|--------------------|----------------------------------|----------------------------|
| <u>Rheological parameters</u>                                  |                          |                          |                    |                                  |                            |
| Pre-exponential factor<br>(MPa <sup>-n</sup> s <sup>-1</sup> ) | 6.6069e-8                | 0.1                      | 5e-6               | 1600                             | N.A.                       |
| Activation Energy<br>(kJ.mol <sup>-1</sup> )                   | 135                      | 244                      | 190                | 520                              | N.A.                       |
| Stress exponent                                                | 3.1                      | 3.2                      | 3                  | 3.5                              | N.A.                       |
| Water fugacity                                                 | 0                        | 0                        | 0                  | 1000                             | N.A.                       |
| Water fugacity exponent                                        | 0                        | 0                        | 0                  | 1.2                              | N.A.                       |
| Activation volume<br>(m <sup>3</sup> .mol <sup>-1</sup> )      | 0                        | 0                        | 0                  | 23e-6                            | N.A.                       |
| Reference density<br>(kg m <sup>-3</sup> )                     | 2800                     | 2900                     | 2800               | 3300                             | 3360                       |
| Cohesion<br>(MPa)                                              | 10                       | 10                       | 5                  | 10                               | 10                         |
| Cohesion after softening<br>(MPa)                              | 2                        | 4                        | 1                  | 2                                | 2                          |
| Coefficient of friction                                        | 0.577                    | 0.577                    | 0.134              | 0.577                            | 0.577                      |
| Softened coeff. of friction                                    | 0.115                    | 0.115                    | 0.0134             | 0.115                            | 0.115                      |
| Saturation strain <sup>g</sup>                                 | 0.2                      | 0.2                      | 0.2                | 0.2                              | 0.2                        |
| Melt softening factor                                          | 1.0e-3                   | 1.0e-3                   | 1.0e-3             | 1.0e-3                           | 1.0e-3                     |
| Softening melt fraction                                        | 0.2-0.3                  | 0 - 0.3                  | 0 - 0.3            | 0.01-0.08                        | 0.01-0.08                  |

<sup>a</sup> Upper crust rheology is based on quartzite rheology (Paterson and Luan, 1990).

<sup>b</sup> Fault rheology is based on wet quartzite rheology (Brace and Kohlstedt, 1980).

<sup>c</sup> Lower crust rheology is based on mafic granulite (Wang et al., 2012)

<sup>d</sup> Lithospheric mantle rheology is based on wet olivine (Hirth et al., 2003)

<sup>f</sup> Asthenosphere has a constant viscosity of 1e20 Pa.s

<sup>g</sup> Saturation strain is the maximum cumulative strain at which softening reaches its minimum value

17

TABLE DR1 cont.

| Parameters                                                                                                                                                                        | Upper crust | Lower crust | Fault  | Lithospheric mantle | Asthenosphere |
|-----------------------------------------------------------------------------------------------------------------------------------------------------------------------------------|-------------|-------------|--------|---------------------|---------------|
| <u>Thermal parameters</u>                                                                                                                                                         |             |             |        |                     |               |
| Thermal expansivity<br>(K <sup>-1</sup> )                                                                                                                                         | 3e-5        | 3e-5        | 3e-5   | 3e-5                | 3e-5          |
| Heat capacity<br>(J K <sup>-1</sup> kg <sup>-1</sup> )                                                                                                                            | 1000        | 1000        | 1000   | 1000                | 1000          |
| Thermal diffusivity<br>(m <sup>2</sup> s <sup>-1</sup> )                                                                                                                          | 1.0e-6      | 1.0e-6      | 1.0e-6 | 1.0e-6              | 1.0e-6        |
| Latent heat of fusion<br>(kJ kg <sup>-1</sup> )                                                                                                                                   | 300         | 300         | 300    | 300                 | 300           |
| Radiogenic heat<br>(W m <sup>-3</sup> )                                                                                                                                           | 1.2e-6      | 0.6e-6      | 1.2e-6 | 0.02e-6             | 0             |
| Density change upon<br>melting (%) <sup>h</sup>                                                                                                                                   | 13          | 13          | 13     | 13                  | 13            |
| Solidus <sup>i</sup> $a_0$<br>(K)                                                                                                                                                 | 993         | 993         | 993    | 1393                | 1393          |
| Solidus $a_1$<br>(K Pa <sup>-1</sup> )                                                                                                                                            | -1.2e7      | -1.2e7      | -1.2e7 | 1.329e-7            | 1.329e-7      |
| Solidus $a_2$<br>(K Pa <sup>-2</sup> )                                                                                                                                            | 1.2e16      | 1.2e16      | 1.2e16 | -5.104e-18          | -5.104e-18    |
| Liquidus $b_0$<br>(K)                                                                                                                                                             | 1493        | 1493        | 1493   | 2013                | 2013          |
| Liquidus $b_1$<br>(K Pa <sup>-1</sup> )                                                                                                                                           | -1.2e7      | -1.2e7      | -1.2e7 | 6.15e-8             | 6.15e-8       |
| Liquidus $b_2$<br>(K Pa <sup>-2</sup> )                                                                                                                                           | 1.6e16      | 1.6e16      | 1.6e16 | 3.12e-18            | 3.12e-18      |
| <sup>h</sup> Melt fraction is calculated following McKenzie and Bickle, (1988). The density of partially melted rocks decreases linearly with the melt fraction.                  |             |             |        |                     |               |
| <sup>i</sup> Solidus and liquidus are defined by a polynomial function of pressure (P): $T_s = a_0 + a_1 \times P + a_2 \times P^2$ , $T_l = b_0 + b_1 \times P + b_2 \times P^2$ |             |             |        |                     |               |

18

19 Figure DR1: Evolution of fault patterns in the pull-apart region for both the decoupled (A)  
 20 and coupled (B) models. Faults have a grey shading on the SW-NE and E-W cross-sections  
 21 (cf. inset). On both coupled and decoupled experiments steeply dipping extensional fractures  
 22 sub-perpendicular to the direction of plate motion evolve into normal faults dissecting the  
 23 pull-apart region into fault-bounded blocks.

24

25 Figure DR2: Strain fields for the coupled model. A/ Maps of the topographic surface showing  
 26 evolution of brittle faults (black lines) through times. B/ Ductile strain field and flow field at  
 27 6 m.y.: B<sub>1</sub>/ 3D view of the model showing the location of the cross-section in panel B<sub>2</sub>. The  
 28 Moho surface is colored for elevation (blue is 40 km depth; brown is 26 km depth). Strain  
 29 markers at the Moho, initially spherical, are in dark grey. B<sub>2</sub>/ Cross-section showing  
 30 deformed strain markers in the lower crust, and foliation trajectories (dashed lines). Strain  
 31 markers are colored for strain rate. B<sub>3</sub>/ Forward streamlines starting on a series of point  
 32 initially distributed along a horizontal NW-SE diagonal at 38 km depth in the lower crust.  
 33 Streamlines are colored for elevation. They are broadly aligned with the direction of plate  
 34 motion. Grey arrows show the velocity vectors at 38 km depth within the lower crust. C/  
 35 Velocity streamlines for the coupled (C<sub>1</sub>) and decoupled models (C<sub>2</sub>) at 6 m.y. In both cases  
 36 streamlines start in the lower crust.

37

38 Figure DR3: Finite strain markers in the coupled model at 6.7 m.y. A/ Various views of finite  
 39 strain markers initially 2 km above the Moho (i.e. 38 km depth). Color shows the topography  
 40 of the Moho. B/ Various views of finite strain markers initially located at the top of the lower  
 41 crust (20 km depth). Color shows the topography of the top of the lower crust.

42



Figure DR4: Assessing exhumation of the deep crust in the decoupled experiment (i.e. crustal thickness of 60 km). A/ Distribution at  $t = t_0$  yr of a set of regularly spaced spherical strain markers (radius 1.5 km) each located at 54 km depth. Each sphere consists in 2000 passive tracers homogeneously distributed at its surface. The deformation of these spheres documents the evolving shape and magnitude of the finite strain. B/ Snapshot at  $t = t_0 + 6.7$  m.y. showing deformed spheres initially located at 42 km ( $B_1$ ) and 54 km depth ( $B_2$ ). The color of each individual tracer is a function of its depth. In the shallow part of the dome, rocks at depth between 4.4 and 1.8 km originate from the deeper crust at depth between 42 and 54 km; a decompression of ~1000 MPa in 6.7 m.y.

52

## 53 REFERENCES CITED

- 54 Brace, W.F., and Kohlstedt, D.L., 1980, Limits on lithospheric stress imposed by laboratory  
55 experiments: *Journal of Geophysical Research*, v. 85, p. 6248-6252,  
56 doi:10.1029/JB085iB11p06248.
- 57 Hirth, G., and Kohlstedt, 2003, Rheology of the upper mantle and the mantle wedge: a view  
58 from the experimentalists. *In* Eiler, J, ed., *Inside the Subduction Factory: Geophysical*  
59 *Monograph*, American Geophysical Union, Washington DC, p. 83-105.
- 60 McKenzie, D.R, and Bickle, M.J., 1988, The volume and composition of melt generation by  
61 extension of the lithosphere: *Journal of Petrology*, v. 29, p. 625-679,  
62 doi:10.1093/petrology/29.3.625.
- 63 Paterson, M.S., and Luan, F.C., 1990, Quartzite rheology under geological conditions, *in*  
64 Knipe, R.J, and Rutter, E.H., eds., *Deformation Mechanisms, Rheology and Tectonics:*  
65 *London, Geological Society, London, Special Publication 54*, p. 299-307.

- 66 Rosenberg, C. L., and Handy, M. R., 2005, Experimental deformation of partially melted  
67 granite revisited: implications for the continental crust. *Journal of Metamorphic Geology*,  
68 v. 23, p. 19–28, doi:10.1111/j.1525-1314.2005.00555.x.
- 69 Wang, Y.F, Zhang, J.F., Jin, Z.M., and Green, H.W., 2012, Mafic granulite rheology:  
70 Implications for a weak continental lower crust: *Earth and Planetary Science Letters*, v.  
71 353-354, p. 99-107, doi:10.1016/j.epsl.2012.08.004.

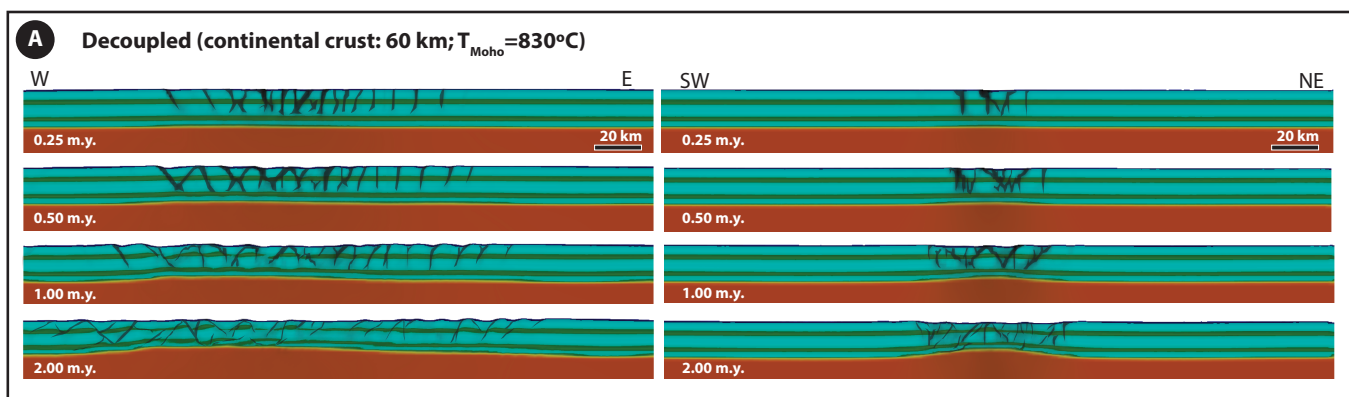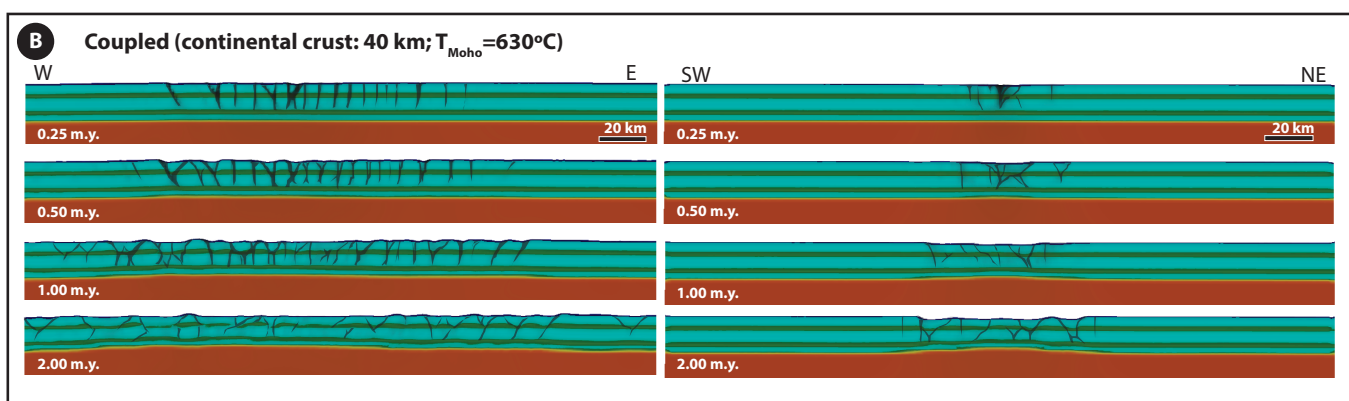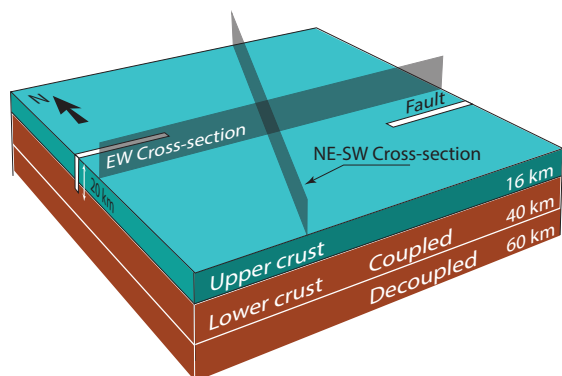

Figure DR1

Rey et al., Gneiss Domes in Pull-Apart

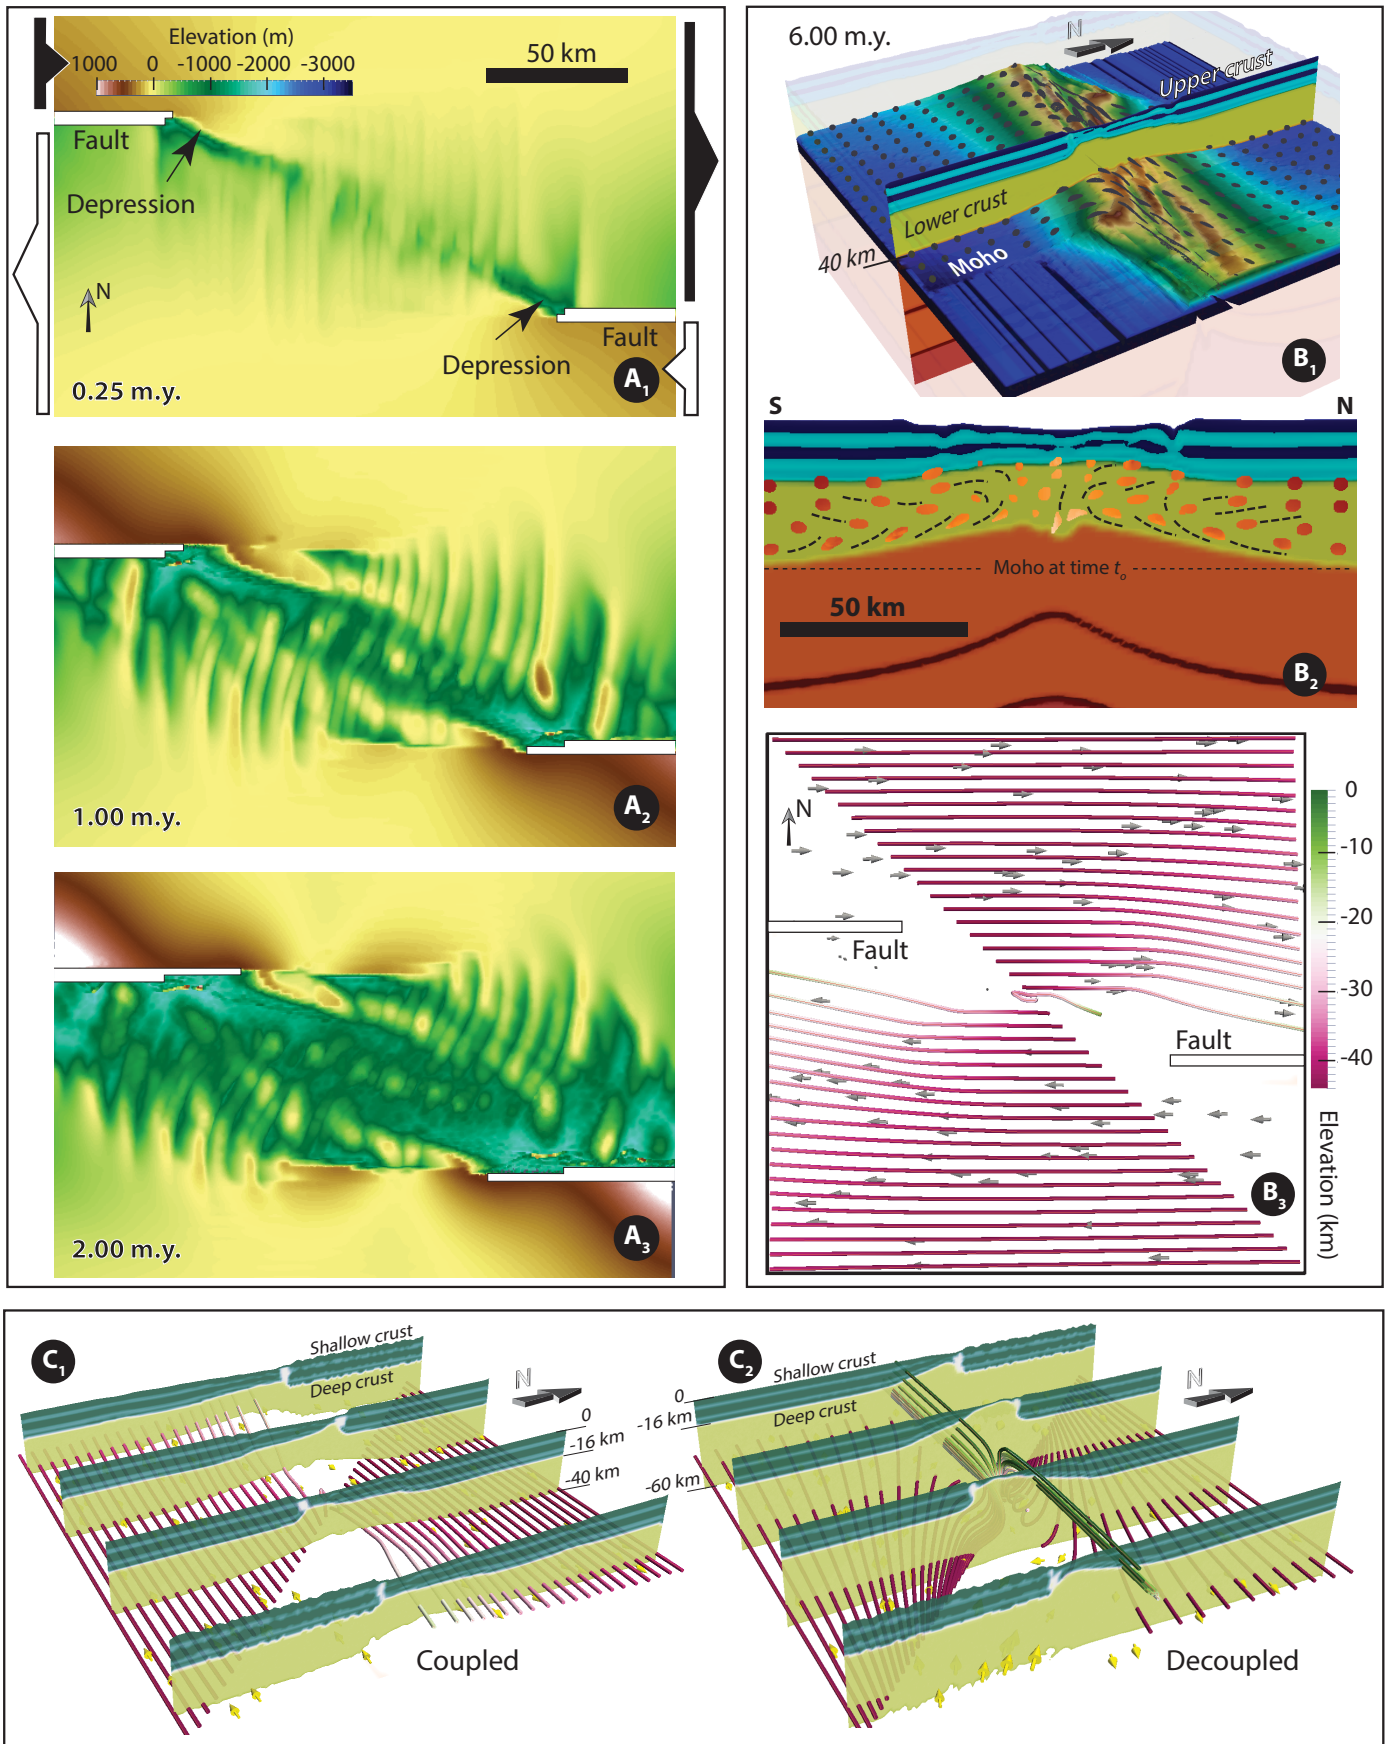

Figure DR2

Rey et al., Gneiss Domes in Pull-Apart

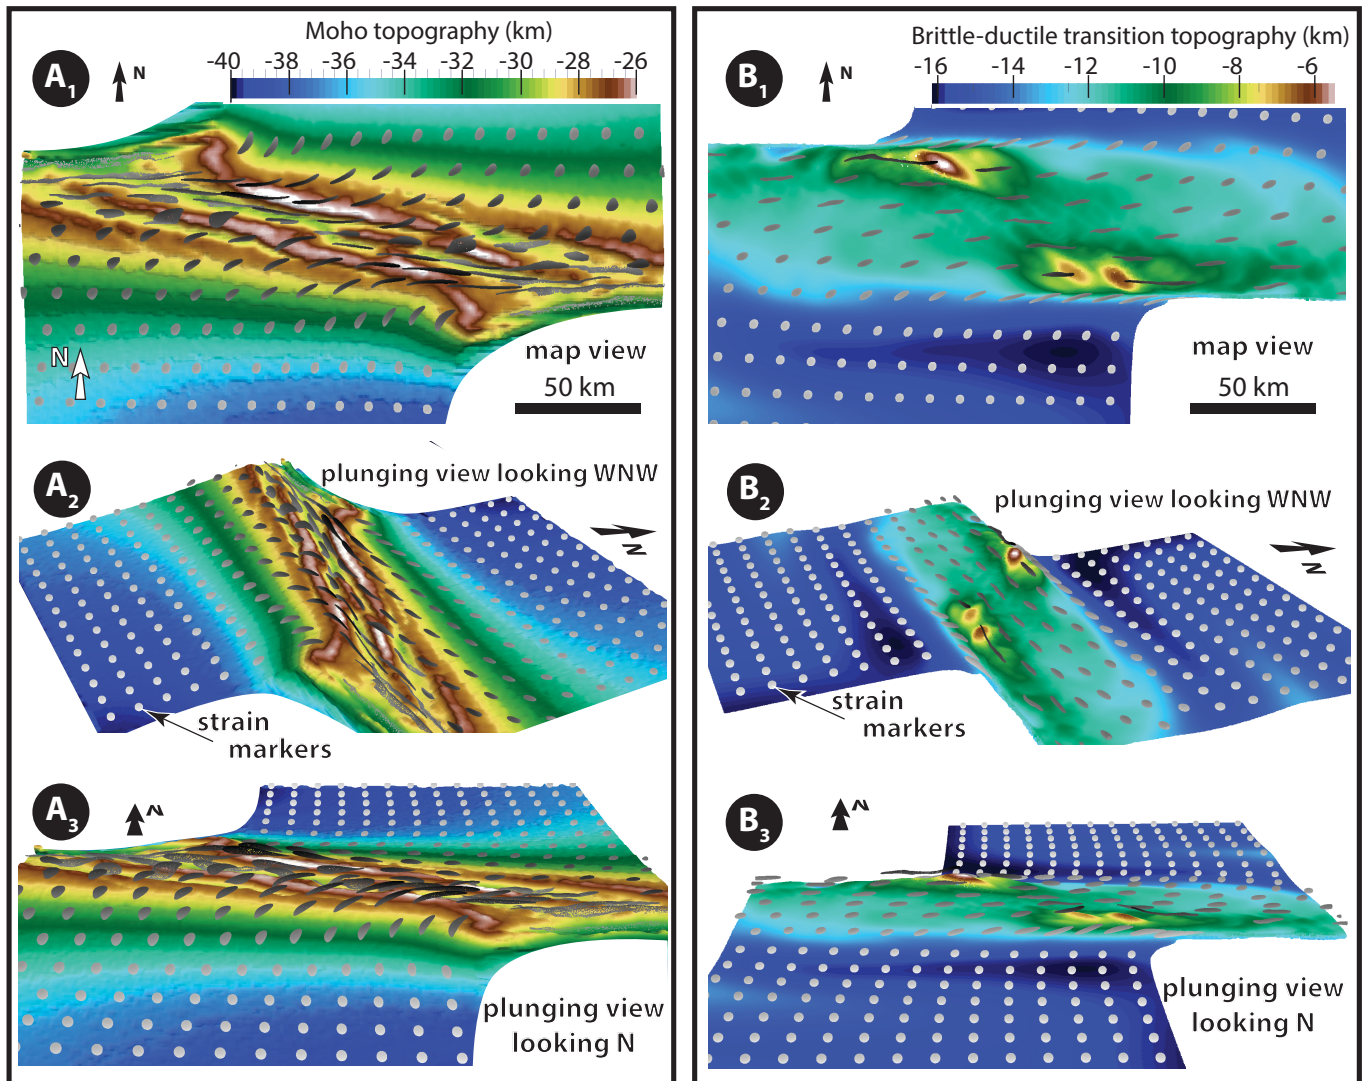

Figure DR3

Rey et al., Gneiss Domes in Pull-Apart



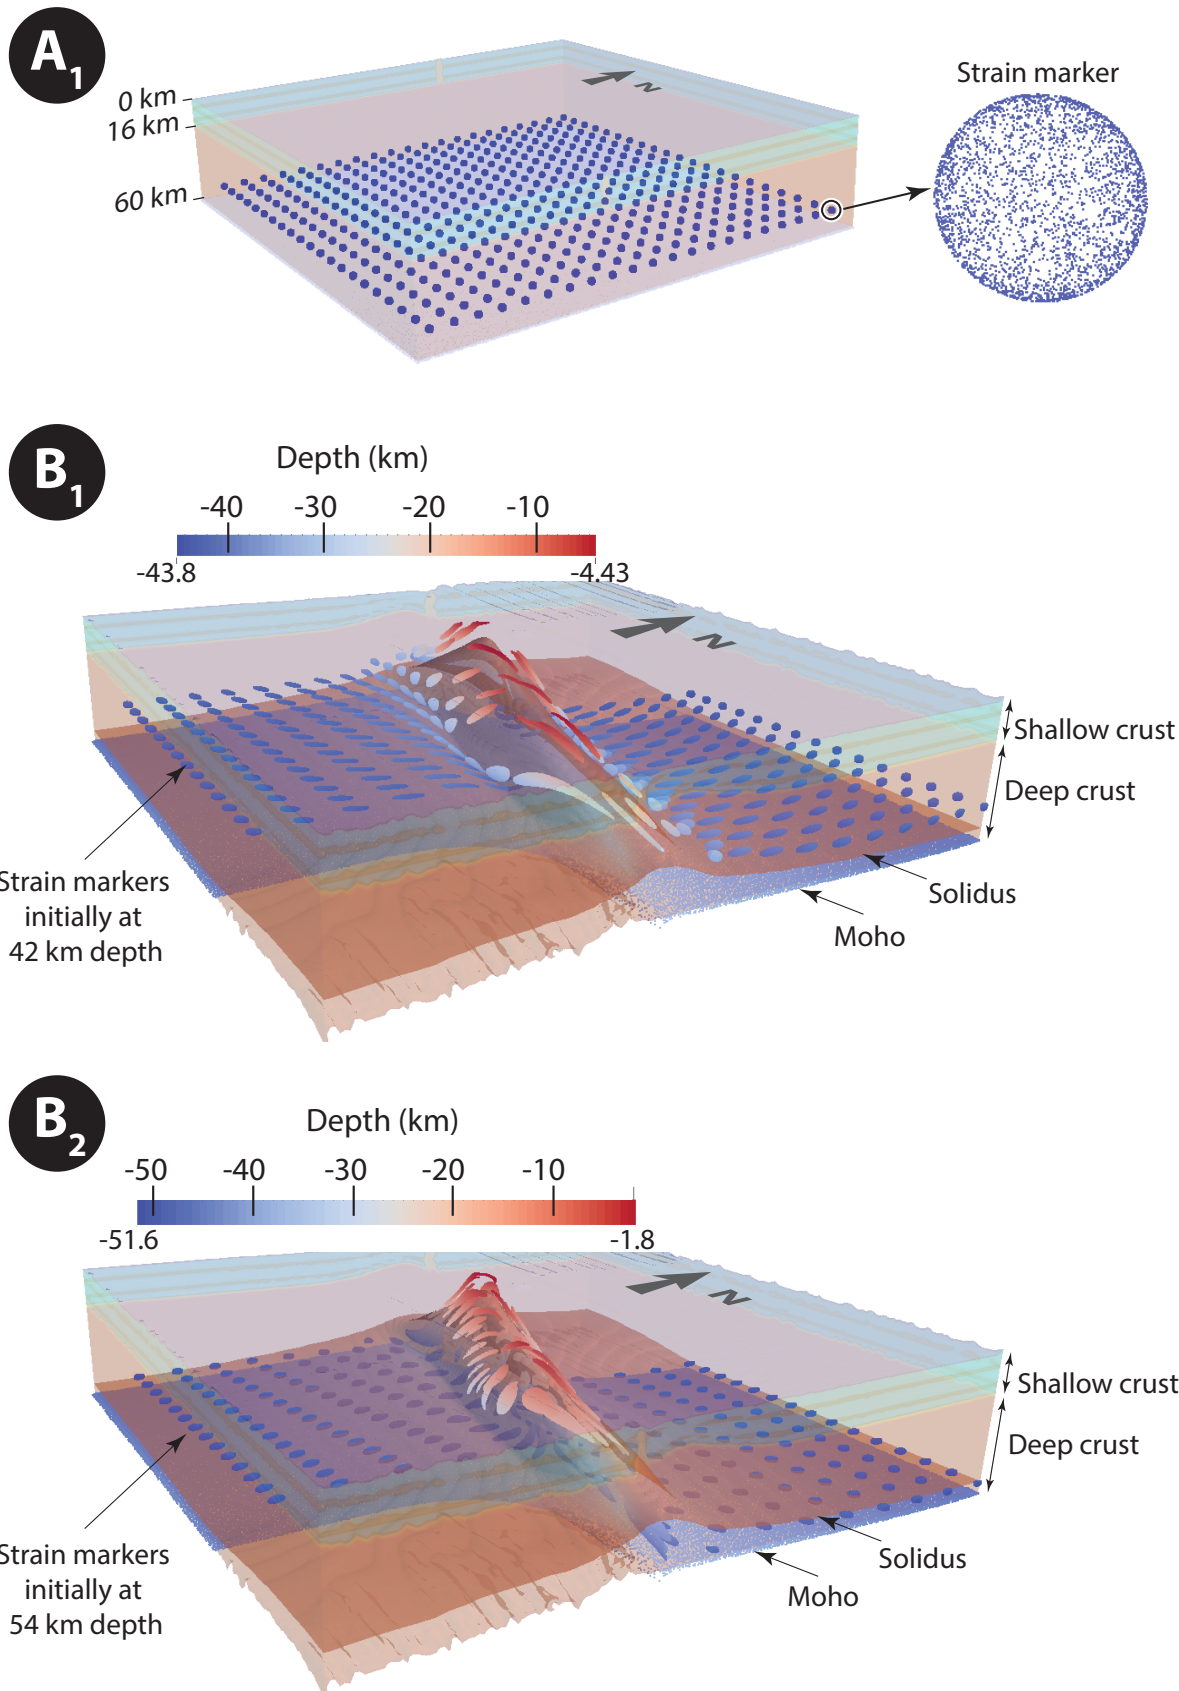

Figure DR4
